# Supplementary material for: Novel waterborne UV-curable coatings based on hyperbranched polymersviaelectrophoretic deposition
Source: Royal Society of Chemistry journal article supplement (doi:10.1039/c9ra01500k), 2019-01-01
Supplement: c9ra01500k1.pdf [file c9ra01500k1.pdf]

## Support information

### **The novel waterborne UV-curable coatings based on hyperbranched polymer via electrophoretic deposition**

Junhua Chen <sup>ac</sup>, Kaimei Peng <sup>\*b</sup>, Weiping Tu <sup>\*a</sup>

<sup>a</sup> School of Chemistry and Chemical Engineering, South China University of Technology, Guangzhou 510640, China.

<sup>b</sup> School of Chemistry and Chemical Engineering, Qiannan Normal University for Nationalities, Duyun 558000, China

<sup>c</sup> School of Environmental and Chemical Engineering, Zhaoqing University, Zhaoqing 526061, China

\*Corresponding Authors:

E-mail: cewptu@yeah.net (W. Tu), scutpkm@163.com (K. Peng)

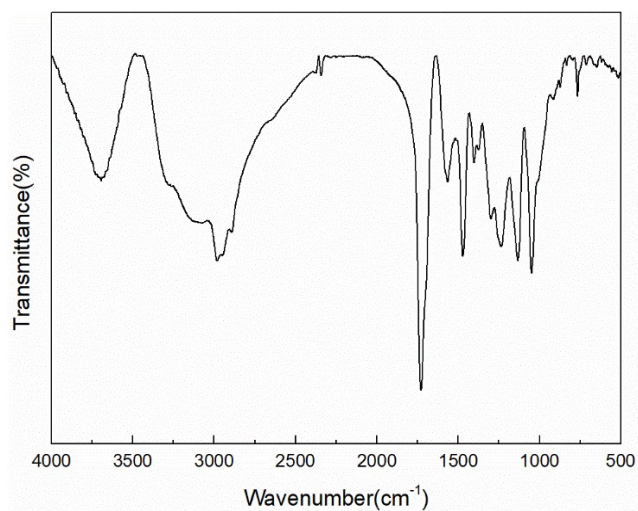

**Fig. S1.** FT-IR spectrum of H202

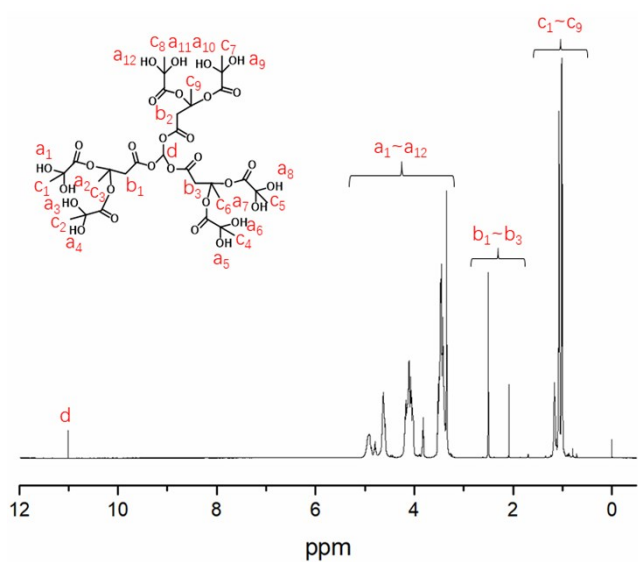

**Fig. S2.**  $^1\text{H-NMR}$  spectrum of H202

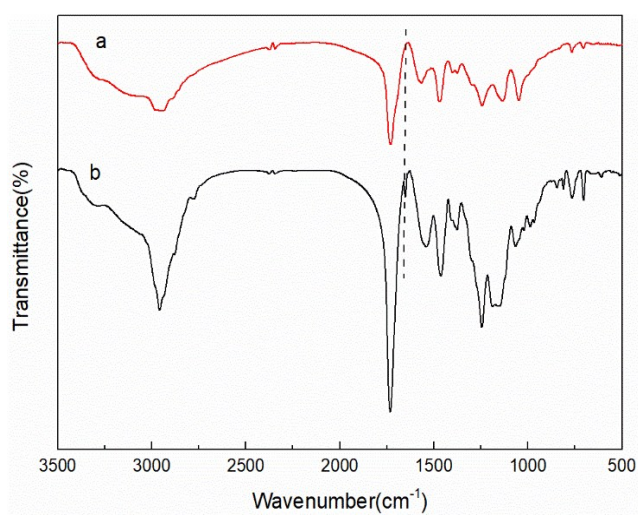

**Fig. S3.** FT-IR spectrum of IPDI-HEA (a) and acrylic copolymers with IPDI-HEA (b).

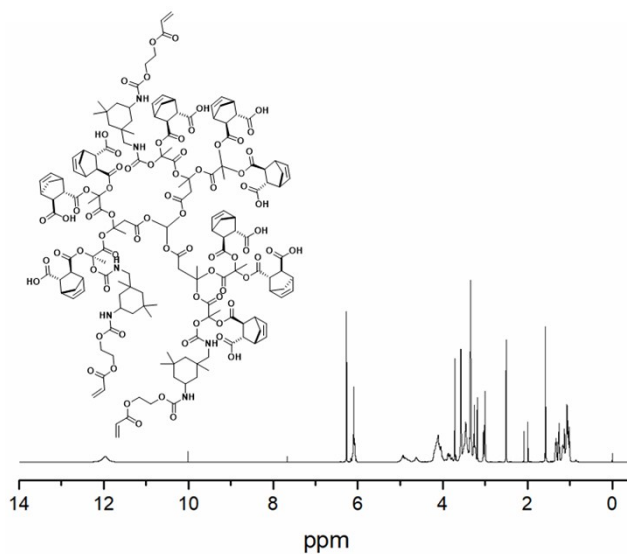

**Fig. S4.** <sup>1</sup>H-NMR spectrum of HBPE-CDA-IPDI-HEA39

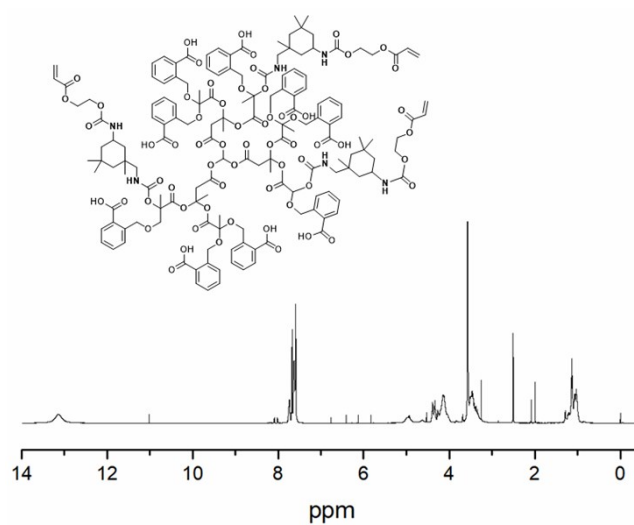

**Fig. S5.** <sup>1</sup>H-NMR spectrum of HBPE-PA-IPDI-HEA39

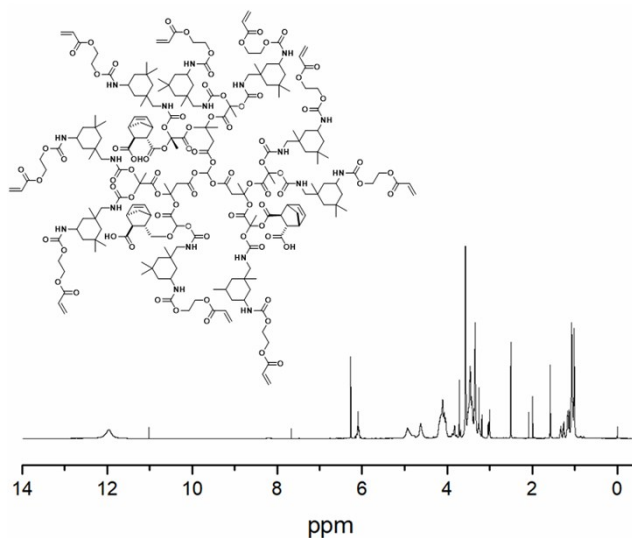

**Fig. S6.**  $^1\text{H-NMR}$  spectrum of HBPE-CDA-IPDI-HEA93

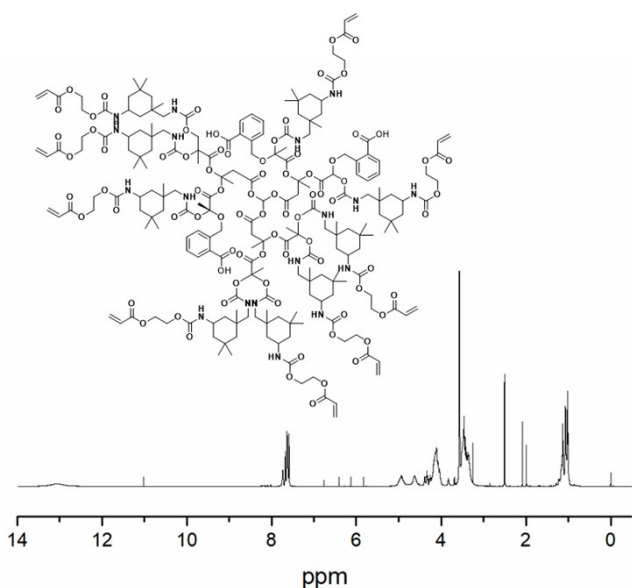

**Fig. S7.**  $^1\text{H-NMR}$  spectrum of HBPE-PA-IPDI-HEA93

The size exclusion chromatography analysis conformed to narrowly dispersed polystyrene standards using tetrahydrofuran (THF) as the eluent. As shown in Fig. S8 and Table S1, the number average molecular weight  $M_n$  of unmodified WPA was measured to be  $\sim 10.185$  kg/mol, and the polydispersity index  $M_w/M_n$  was 1.786. Based on the  $M_n$  value and the amount of monomer feeding, the approximate total repeat unit number of WPA in Fig. 1a was calculated to be  $\sim 83$ . Meanwhile, the

number average molecular weight  $M_n$  of modified WPA with IPDI-HEA was measured to be  $\sim 12.648$  kg/mol, and the polydispersity index  $M_w/M_n$  was 1.899. The effect governed the trend in relatively wide polydispersity, this also accords with our speculation, which showed that the number molecular weight ( $M_n$ ) was obviously elevated after grafted of IPDI-HEA.

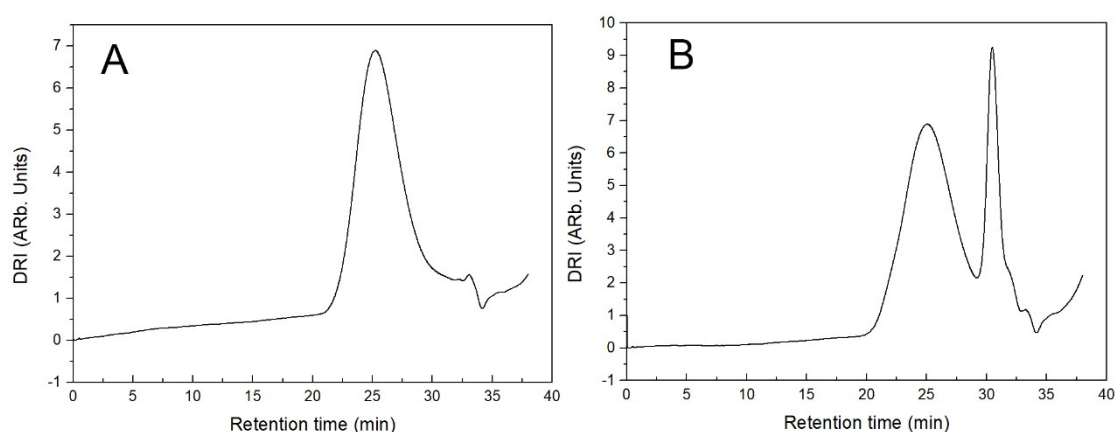

**Fig. S8.** SEC trace of the acrylic copolymer (A) and the unsaturated acrylic copolymer with IPDI-HEA (B).

**Table S1.** Molecular weight and molecular distribution of the acrylic copolymer (A) and the unsaturated acrylic copolymer with IPDI-HEA (B).

| Samples | $M_w$ | $M_n$ | $P_d = M_w / M_n$ |
|---------|-------|-------|-------------------|
| A       | 18191 | 10185 | 1.786             |
| B       | 24026 | 12648 | 1.899             |

**Table S2.** The Zeta potential of modified polyacrylate dispersions

| Formulations | Zeta potential (mV) |
|--------------|---------------------|
| WPA          | -32.1               |
| MWPA-CDA93   | -46.2               |
| MWPA-CDA66   | -53.7               |
| MWPA-CDA39   | -67.8               |
| MWPA-PA93    | -44.5               |
| MWPA-PA66    | -53.3               |
| MWPA-PA39    | -63.3               |

**Table S3.** Kinetics analysis results for photopolymerization of waterborne UV-curable EPD with CDA formulations.

| Formulation | Induction time (s) | Peak maximum (s) | Conversion (%) | R (%/sec) | $\Delta H$ (J/g) |
|-------------|--------------------|------------------|----------------|-----------|------------------|
| WPA         | 1.50               | 5.00             | 33.43          | 1.67      | 159              |
| MWPA-CDA66  | 1.25               | 4.75             | 39.32          | 1.91      | 217              |
| MWPA-CDA39  | 1.75               | 5.25             | 36.32          | 1.85      | 204              |
| MWPA-CDA93  | 1.50               | 5.24             | 39.60          | 1.95      | 242              |

**Table S4.** Kinetics analysis results for photopolymerization of waterborne UV-curable EPD with PA formulations.

| Formulation | Induction time (s) | Peak maximum (s) | Conversion (%) | R (%/sec) | $\Delta H$ (J/g) |
|-------------|--------------------|------------------|----------------|-----------|------------------|
| WPA         | 1.50               | 5.0              | 33.43          | 1.67      | 159              |
| MWPA-PA66   | 1.00               | 4.75             | 39.00          | 1.93      | 193              |
| MWPA-PA39   | 0.75               | 4.25             | 37.50          | 1.83      | 181              |
| MWPA-PA93   | 1.75               | 4.75             | 39.21          | 1.96      | 220              |

**Table S5.** Thermal stability of waterborne UV-curable EPD coatings with CDA.

| Formulation | $T_{max1}$ (°C) | $T_{max2}$ (°C) | $T_{max3}$ (°C) | $Y_c$ at 600°C (%) |
|-------------|-----------------|-----------------|-----------------|--------------------|
| WPA         | 194.5           | 326             | 416.5           | 2.08               |
| MWPA-CDA66  | 194.1           | 327.4           | 417.1           | 3.02               |
| MWPA-CDA39  | 193.7           | 325.8           | 415.4           | 3.36               |
| MWPA-CDA93  | 158.0           | 319.9           | 415.6           | 3.05               |

**Table S6.** Thermal stability of waterborne UV-curable EPD coatings with PA.

| Formulation | $T_{max1}$ (°C) | $T_{max2}$ (°C) | $T_{max3}$ (°C) | $Y_c$ at 600°C (%) |
|-------------|-----------------|-----------------|-----------------|--------------------|
| WPA         | 194.5           | 326             | 416.5           | 2.08               |
| MWPA-PA66   | 177.8           | 308.7           | 407.1           | 3.10               |
| MWPA-PA39   | 189.2           | 310.2           | 402.1           | 3.24               |
| MWPA-PA93   | 168.1           | 307.7           | 418.4           | 3.15               |

**Table S7.** The corresponding detailed data obtained from tensile measurements.

| Formulations | Tensile strength (MPa) | Breaking elongation (%) | Young's modulus (MPa) |
|--------------|------------------------|-------------------------|-----------------------|
| WPA          | 2.22                   | 1.27                    | 174.57                |
| MWPA-CDA66   | 1.17                   | 2.52                    | 46.19                 |
| MWPA-CDA93   | 4.24                   | 2.52                    | 160.32                |
| MWPA-CDA39   | 2.62                   | 12.39                   | 21.11                 |
| MWPA-PA66    | 3.51                   | 2.51                    | 147.50                |
| MWPA-PA93    | 3.03                   | 3.00                    | 110.96                |
| MWPA-PA39    | 3.81                   | 1.91                    | 196.75                |

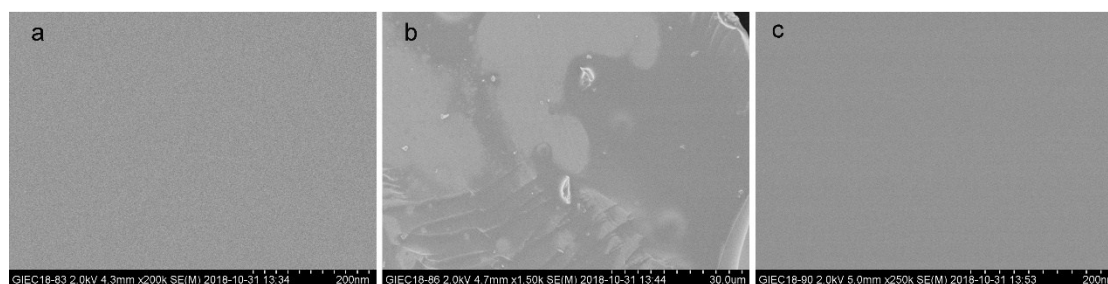

**Fig. S9.** The SEM images of UV-curable waterborne EPD films with different molar content of PA. (a) MWPA-PA66, scale:200 nm; (b) MWPA-PA39, scale:30  $\mu\text{m}$ ; (c) MWPA-PA93, scale:200 nm.

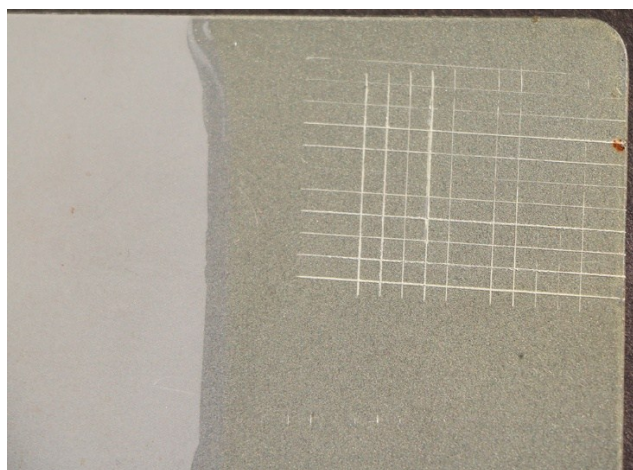

**Fig. S10.** The adhesion test of UV-curable EPD coatings with pure acrylic coatings

(WPA).

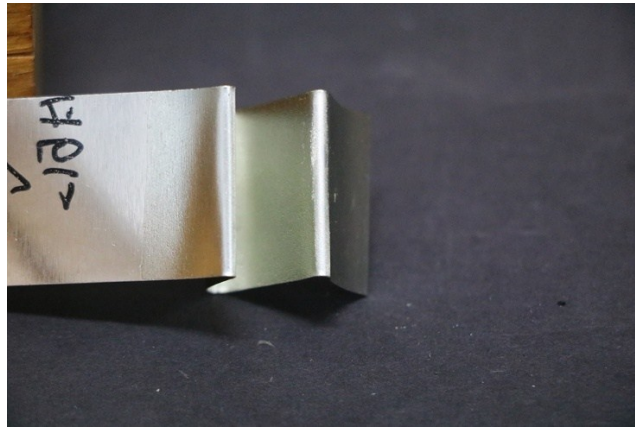

**Fig. S11.** Flexibility of UV-curable EPD coating with pure acrylic coatings (WPA)

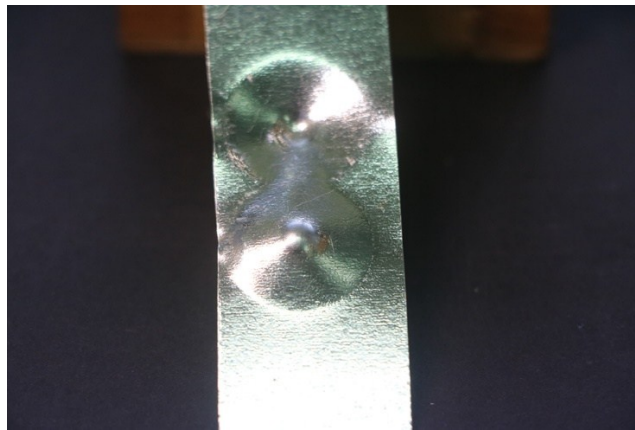

**Fig. S12.** The front and opposite sides of UV-curable EPD coatings with pure acrylic coatings (WPA) coated tin plate after an impact experiment.

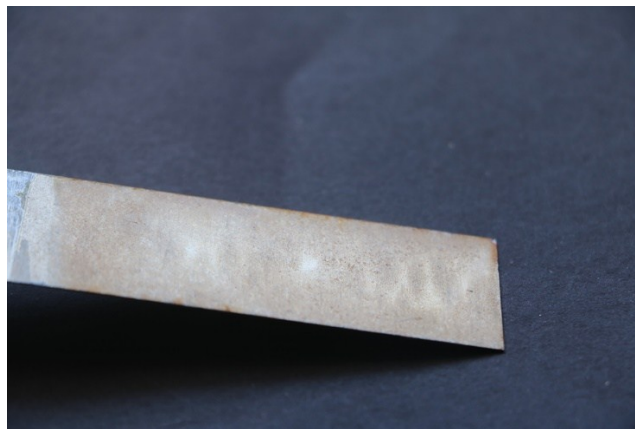

**Fig. S13.** Appearance of the corroded UV-curable EPD specimen surface with pure acrylic coatings (WPA).



**Table S8.** General performance of the UV-curable EPD films.

| Formulations | Thickness<br>( $\mu\text{m}$ ) | Pencil Hardness | Glossiness/ Gs |
|--------------|--------------------------------|-----------------|----------------|
| WPA          | 30                             | 2H              | 92.0           |
| MWPA-CDA66   | 32                             | H               | 74.7           |
| MWPA-CDA39   | 31                             | HB              | 46.3           |
| MWPA-CDA93   | 33                             | 2H              | 49.6           |
| MWPA-PA66    | 32                             | 2H              | 25.9           |
| MWPA-PA39    | 33                             | 3H              | 21.4           |
| MWPA-PA93    | 31                             | 2H              | 43.5           |
